# Supplementary material for: Improved Peptide Backbone Fragmentation Is the Primary Advantage of MS-Cleavable Crosslinkers
Source: PubMed Central journal article supplement (PMC9178559; doi:10.1021/acs.analchem.1c05266), 2022-05-25
Supplement: ac1c05266_si_001.pdf [file ac1c05266_si_001.pdf]

## Supplementary Materials for

# Improved peptide backbone fragmentation is the primary advantage of MS-cleavable crosslinkers

Lars Kolbowski<sup>\*1</sup>, Swantje Lenz<sup>\*1</sup>, Lutz Fischer<sup>1</sup>, Ludwig R Sinn<sup>1</sup>, Francis J O'Reilly<sup>1</sup>, Juri Rappsilber<sup>†,1,2</sup>

\* These authors contributed equally to this work

<sup>1</sup> Technische Universität Berlin, Chair of Bioanalytics, 10623 Berlin, Germany

<sup>2</sup> University of Edinburgh, Wellcome Centre for Cell Biology, Edinburgh EH9 3BF, UK

<sup>†</sup> Corresponding author email address: [juri.rappsilber@tu-berlin.de](mailto:juri.rappsilber@tu-berlin.de)

### **This file includes:**

Supplementary Figures S1-11

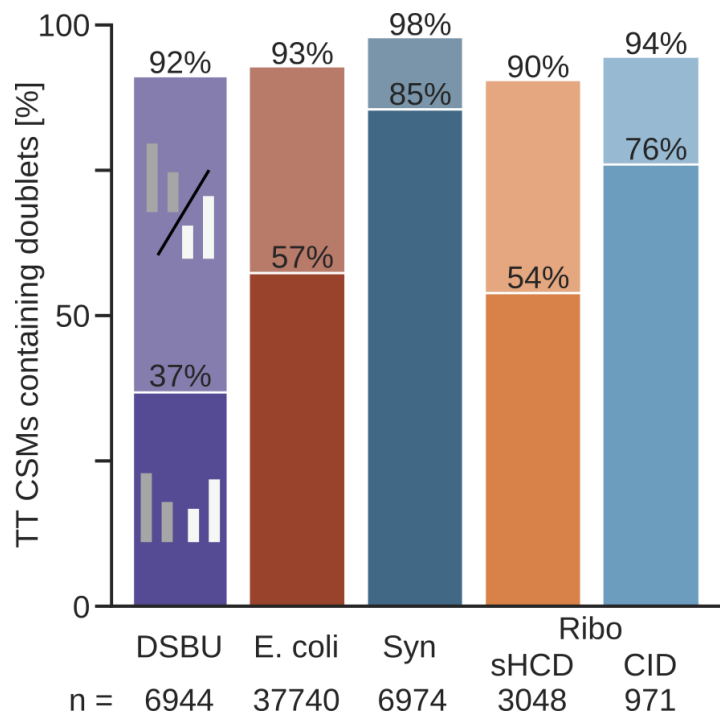

**Figure S1.** Ratio of identified target-target (TT) CSMs (self and heteromeric) that contain one (lighter color) or both (darker color) peptide doublets in each dataset (5% CSM-level FDR). DSSO datasets using sHCD are shown in orange-red while CID-MS3 based methods are in blue colors. The DSBU data (purple colors) is also acquired using sHCD.

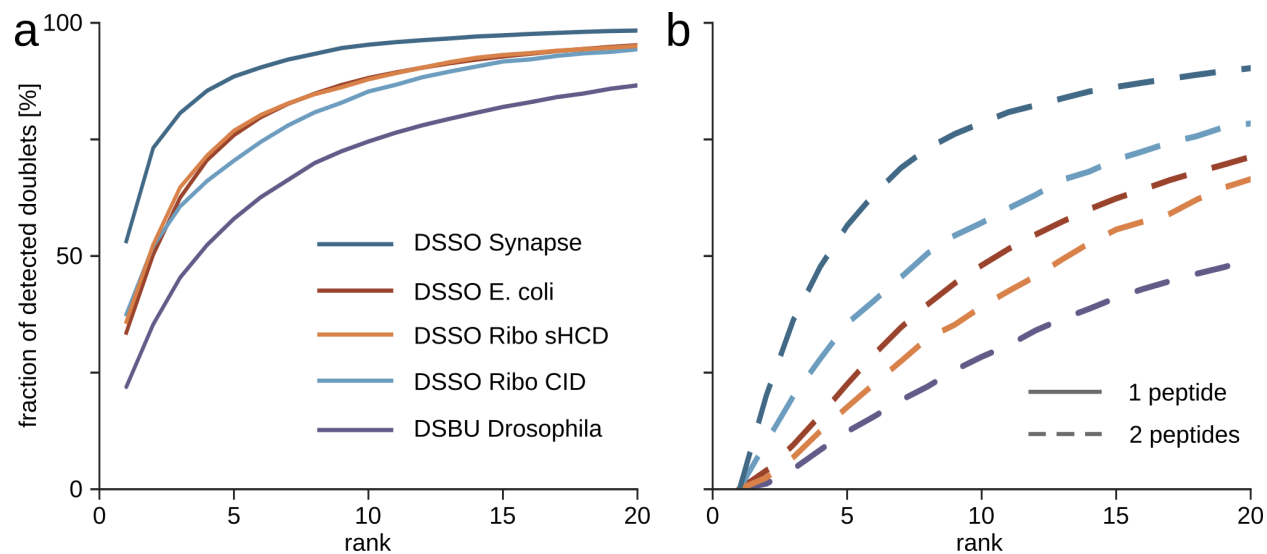

**Figure S2.** Fraction of detected doublets from S1 passing each intensity rank cut-off for the one (b) and both (c) peptides. Shown is the cumulative proportion of CSMs containing doublets.

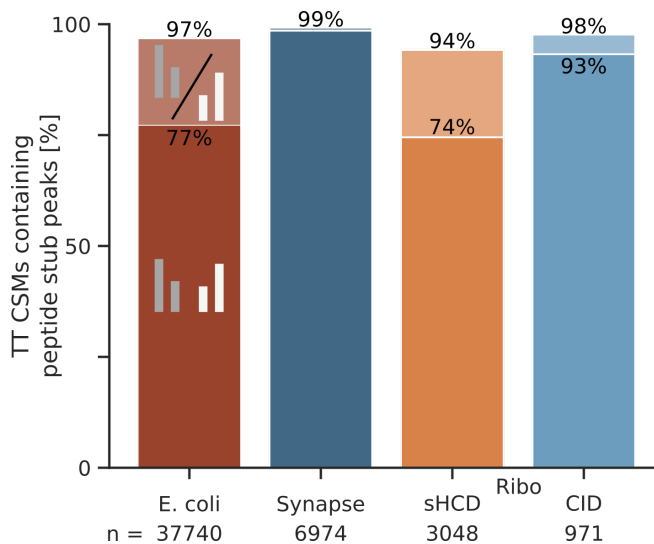

**Figure S3.** Ratio of identified target-target (TT) CSMs that contain at least one peptide stub peak for one (lighter color) or both (darker color) crosslinked peptides across datasets (5% CSM-level FDR).

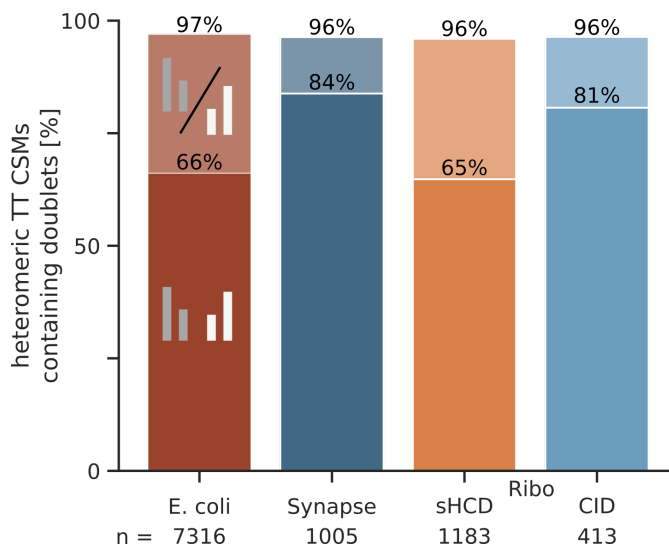

**Figures S4.** Ratio of identified heteromeric target-target (TT) CSMs that contain one (lighter color) or both (darker color) peptide doublets across datasets (5% CSM-level FDR).

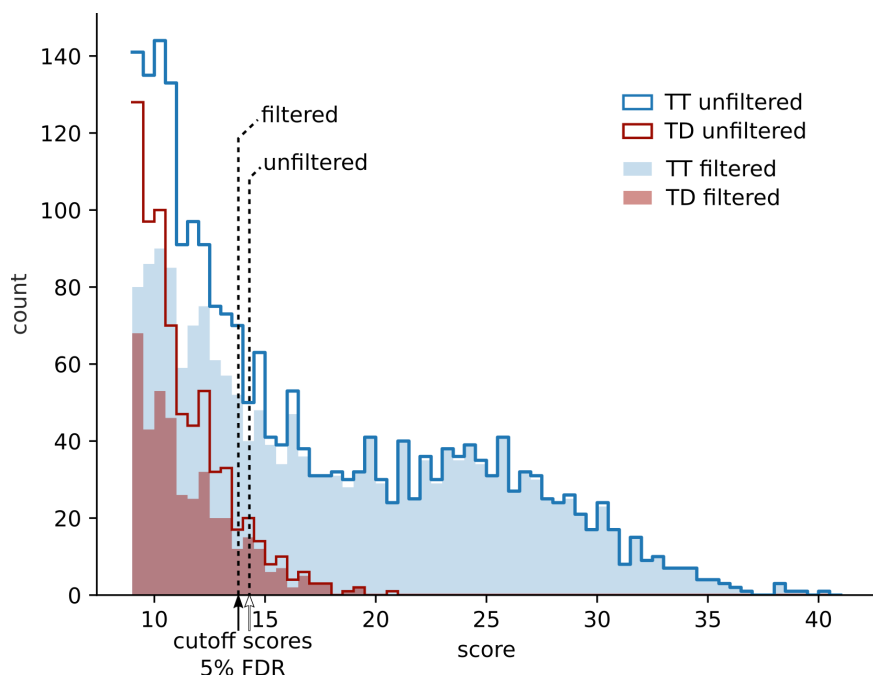

**Figure S5.** Score distribution of heteromeric matches in the Ribosome HCD dataset. Shown is the distribution of targets and target-decoy matches with and without filtering for peptide doublets. Arrows show the resulting score cutoffs at 5% FDR.

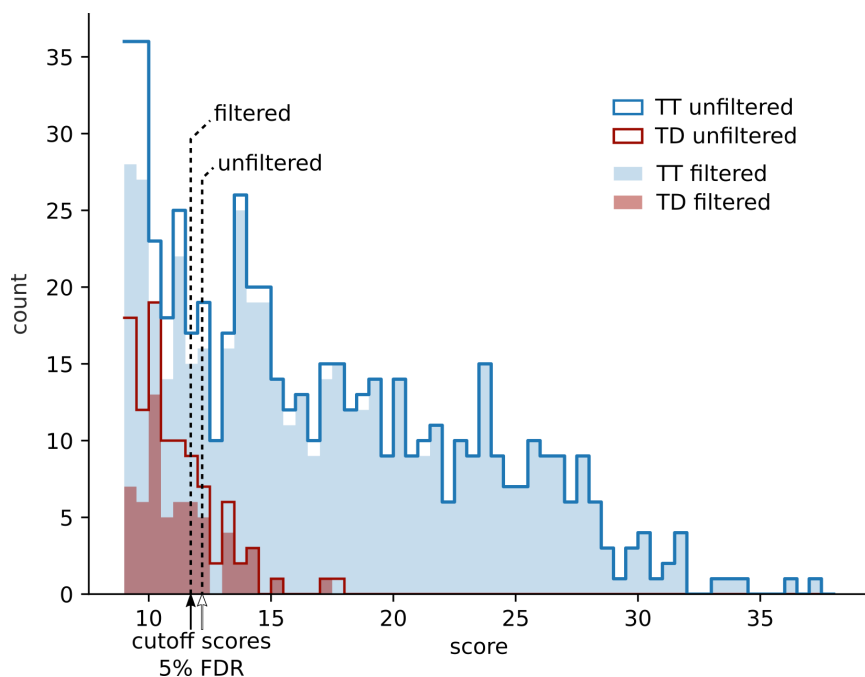

**Figure S6.** Score distribution of heteromeric matches in the Ribosome CID dataset. Shown is the distribution of targets and target-decoy matches with and without filtering for peptide doublets. Arrows show the resulting score cutoffs at 5% FDR.

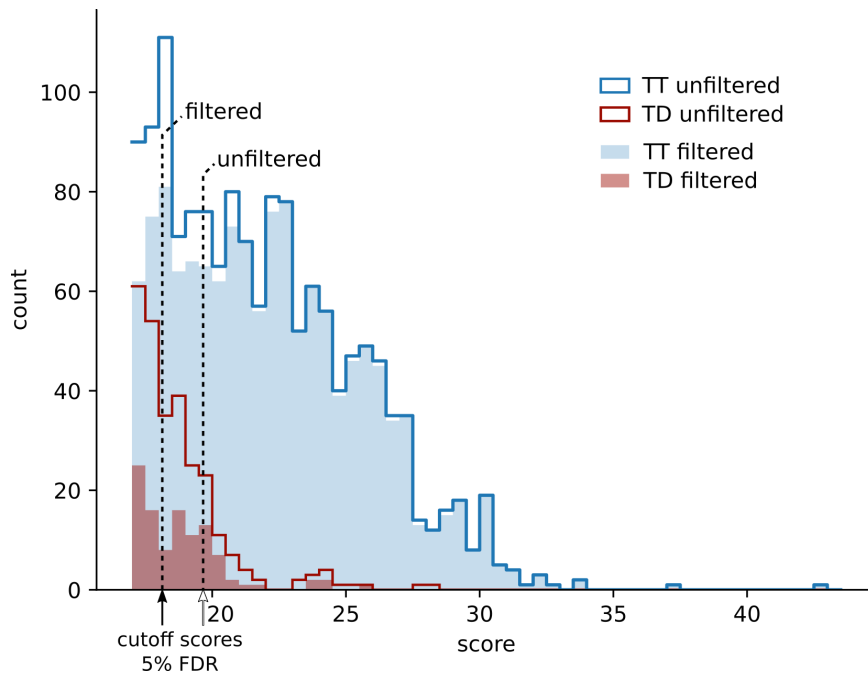

**Figure S7.** Score distribution of heteromeric matches in the Synapse dataset. Shown is the distribution of targets and target-decoy matches with and without filtering for peptide doublets. Arrows show the resulting score cutoffs at 5% FDR.

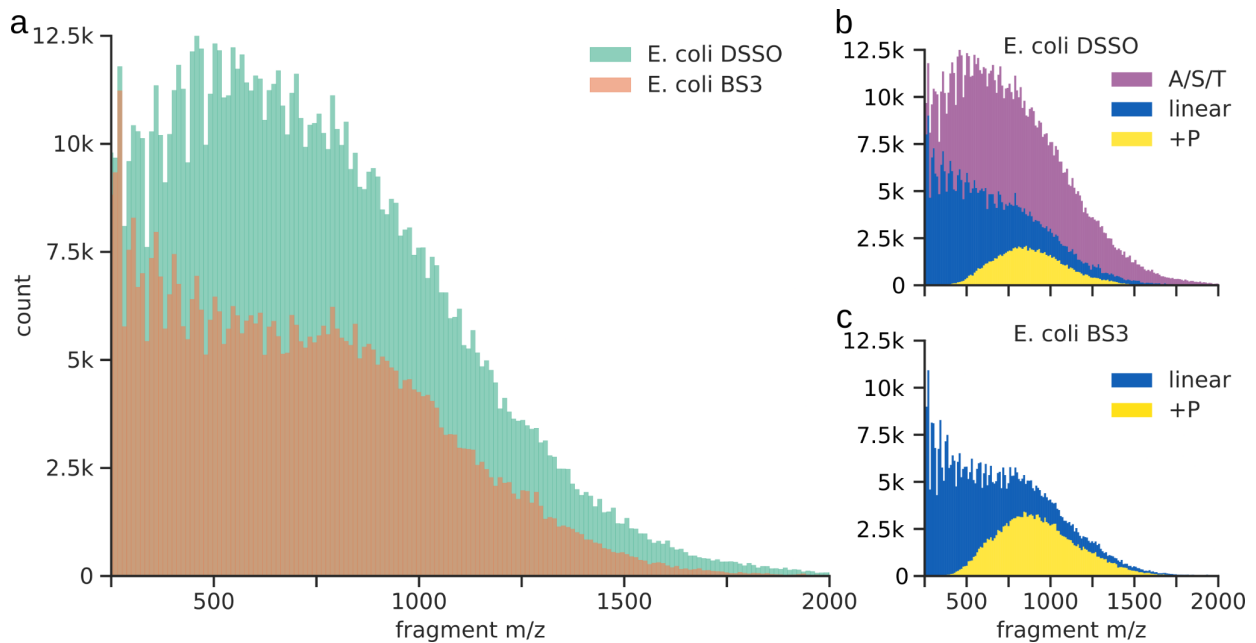

**Figure S8.** (a) Histogram of sequence fragments present in common CSMs ( $n=12919$ ) between the *E. coli* DSSO and the BS3 dataset. (b) and (c) show the distributions from (a) split into the linear, the full second peptide containing (+P) and for the DSSO dataset additionally the cleaved crosslinker stub fragments (A/S/T) as stacked histograms.

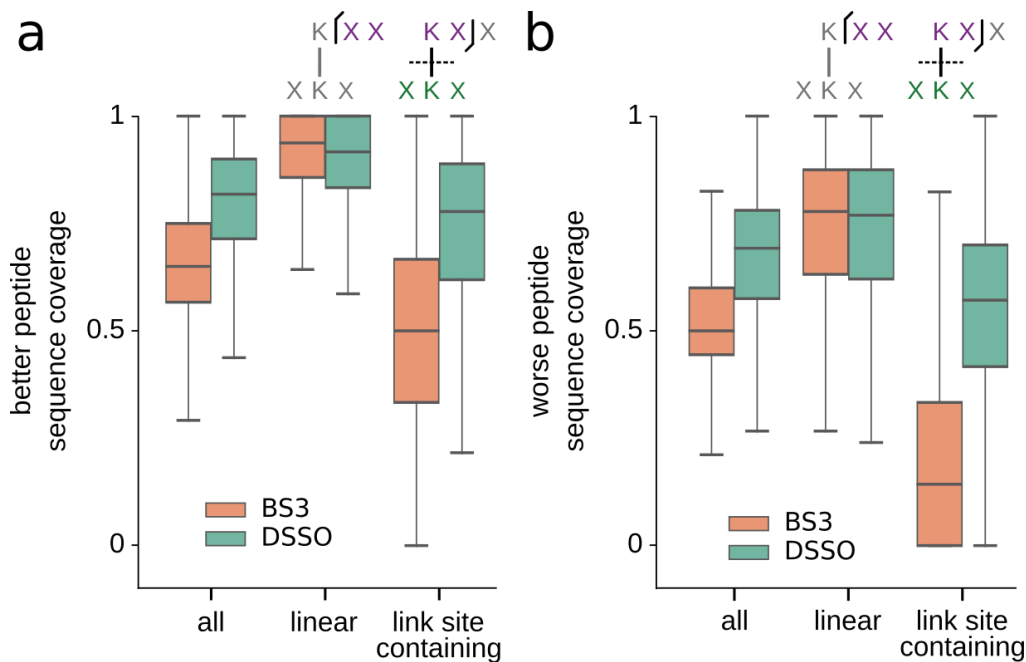

**Figure S9.** Sequence coverage of all, linear and link site-containing fragments (CSMs: n=1437) split into the better (a) and worse (b) fragmenting peptide. Boxplots depict the median (middle line), upper and lower quartiles (boxes), and 1.5 times the interquartile range (whiskers).

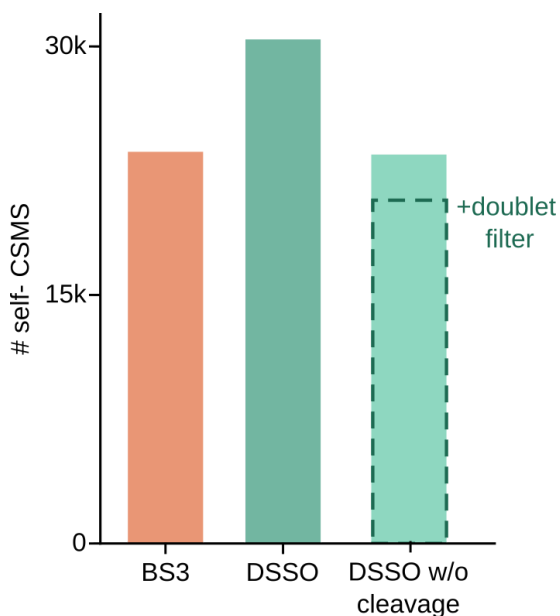

**Figure S10.** Number of self-CSMs passing 5% CSM-level FDR for BS3 and DSSO. DSSO was additionally searched as a non-cleavable crosslinker and filtered for the presence of peptide doublets.

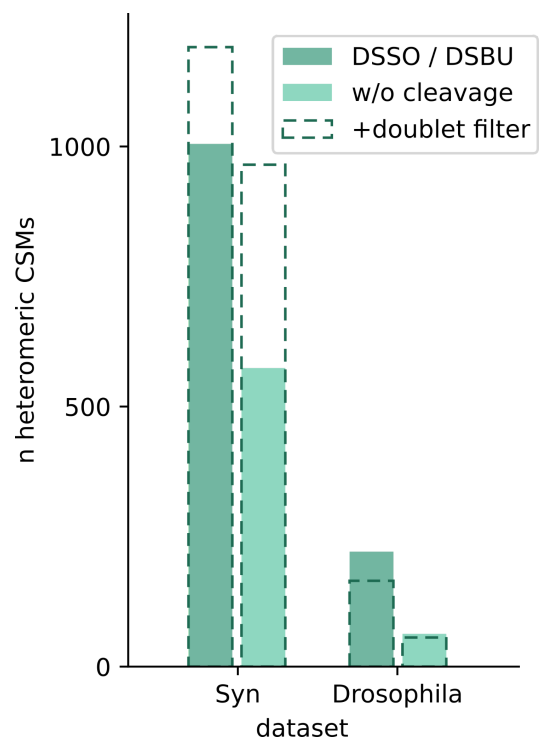

**Figure S11.** Number of heteromeric CSMs passing 5% CSM-level FDR for the Synapse and Drosophila datasets. DSSO was additionally searched as a non-cleavable crosslinker and filtered for the presence of peptide doublets.
